# Supplementary material for: Magnetic anisotropy in octahedral Dy(iii) and Yb(iii) complexes
Source: Royal Society of Chemistry journal article supplement (doi:10.1039/d3dt04352e), 2024-01-01

SP18022016  
 varioMICRO CHNS  
 serial number: 15154051

Graphic report

| No. | Weight [mg] | Name          | Method     | N Area | C Area | H Area | N [%] | C [%] | H [%] | Date       | Time  |
|-----|-------------|---------------|------------|--------|--------|--------|-------|-------|-------|------------|-------|
| 20  | 1.6130      | RM-ADI-445-Dy | 2mgChem80s | 2 662  | 22 279 | 9 707  | 0.00  | 47.72 | 6.624 | 18-01-2024 | 15:24 |

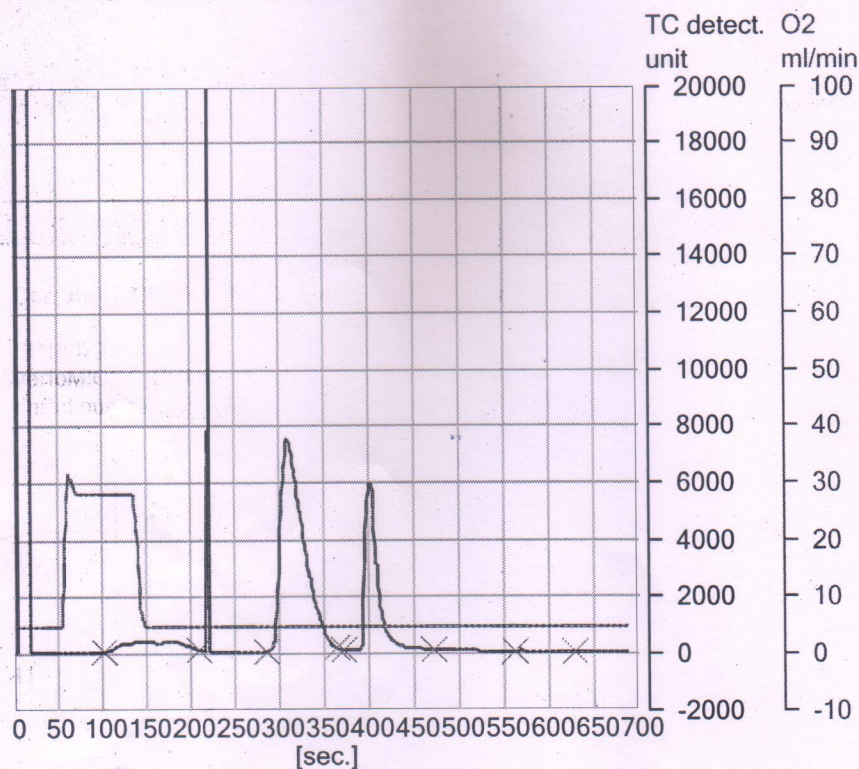

| No. | Weight [mg] | Name       | Method     | N Area | C Area | H Area | N [%] | C [%] | H [%] | Date       | Time  |
|-----|-------------|------------|------------|--------|--------|--------|-------|-------|-------|------------|-------|
| 26  | 2.2600      | RM-ADI-445 | 2mgChem80s | 2 592  | 31 240 | 13 557 | 0.00  | 47.81 | 6.627 | 18-01-2024 | 16:35 |

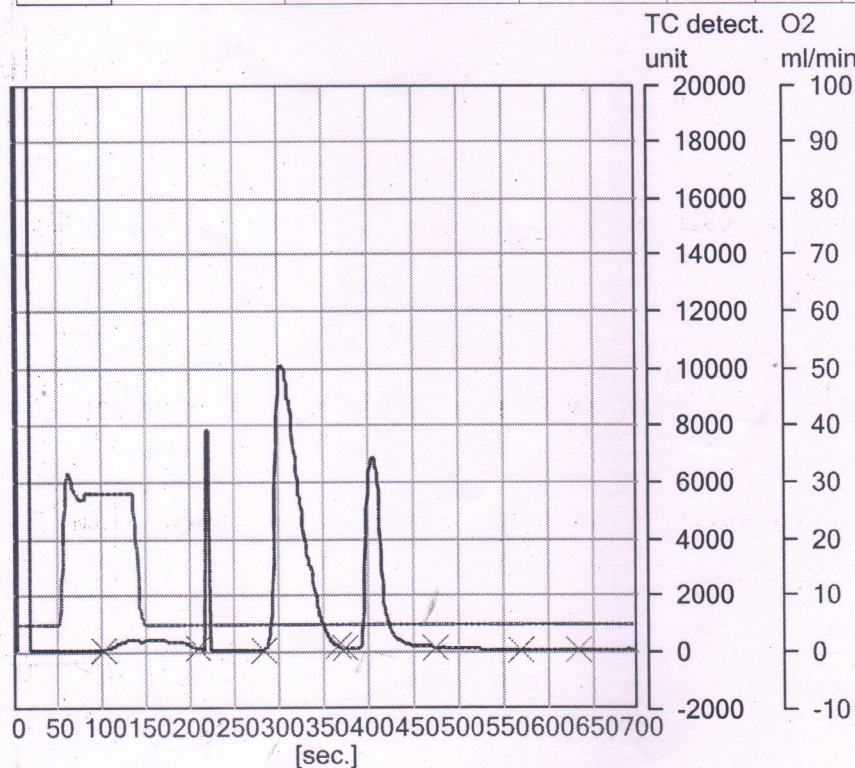

Supplement: d3dt04352e2.pdf [file d3dt04352e2.pdf]
